# Supplementary material for: Barriers to Early Presentation amongst Rural Residents Experiencing Symptoms of Colorectal Cancer: A Qualitative Interview Study
Source: MDPI journal article supplement (doi:10.3390/cancers15010274), 2022-12-31
Supplement: s1 [file s1]

**Table S1: Participant Characteristics**

| Participant ID | Sex | Age Category | Rural Residence Category     | "Native" or "Migrant" Resident | Index of Multiple Deprivation<br>(1 = most deprived, 5 = least deprived) | Employment Status   | Symptoms                                               | Consulted about Symptoms? |
|----------------|-----|--------------|------------------------------|--------------------------------|--------------------------------------------------------------------------|---------------------|--------------------------------------------------------|---------------------------|
| P01            | F   | 60-69        | Rural Village                | "Migrant" Rural Dweller        | 3                                                                        | Retired             | Diarrhoea, rectal bleeding, stomach pain               | Yes                       |
| P02            | F   | 60-69        | Rural Village                | "Migrant" Rural Dweller        | 3                                                                        | Retired             | Diarrhoea, Stomach Pain                                | No                        |
| P03            | F   | 60-69        | Rural Village                | "Migrant" Rural Dweller        | 5                                                                        | Retired             | Diarrhoea, Stomach Pain                                | Yes                       |
| P04            | F   | 50-59        | Rural Village                | "Native" Rural Dweller         | 5                                                                        | Employed: Part Time | Diarrhoea, Constipation, Stomach Pain                  | No                        |
| P05            | F   | 30-39        | Hamlets & Isolated Dwellings | "Migrant" Rural Dweller        | 4                                                                        | Unemployed          | Diarrhoea, Constipation, Stomach Pain                  | No                        |
| P06            | F   | 70-79        | Rural Village                | "Migrant" Rural Dweller        | 5                                                                        | Retired             | diarrhoea                                              | Yes                       |
| P07            | M   | 50-59        | Hamlets & Isolated Dwellings | "Native" Rural Dweller         | 4                                                                        | Self-Employed       | Diarrhoea, Constipation, Stomach Pain                  | Yes                       |
| P08            | F   | 60-69        | Rural Village                | "Migrant" Rural Dweller        | 5                                                                        | Retired             | Diarrhoea, Stomach Pain                                | Yes                       |
| P09            | M   | 80-89        | Rural Village                | "Native" Rural Dweller         | 5                                                                        | Retired             | Diarrhoea, Constipation, Stomach Pain                  | Yes                       |
| P10            | F   | 50-59        | Hamlets & Isolated Dwellings | "Native" Rural Dweller         | 3                                                                        | Self-Employed       | Stomach Pain                                           | No                        |
| P11            | M   | 40-49        | Rural Village                | "Migrant" Rural Dweller        | 5                                                                        | Employed: Full Time | Diarrhoea, Rectal Bleeding, Stomach Pain               | Yes                       |
| P12            | M   | 60-69        | Rural Village                | "Migrant" Rural Dweller        | 5                                                                        | Retired             | Constipation, Stomach Pain                             | No                        |
| P13            | F   | 40-49        | Rural Town and Fringe        | "Native" Rural Dweller         | 5                                                                        | Employed: Part Time | Constipation                                           | No                        |
| P14            | F   | 70-79        | Rural Town and Fringe        | "Native" Rural Dweller         | 5                                                                        | Retired             | Diarrhoea, Stomach Pain                                | No                        |
| P15            | F   | 60-69        | Rural Town and Fringe        | "Native" Rural Dweller         | 3                                                                        | Employed: Part Time | Diarrhoea, Constipation, Rectal Bleeding, Stomach Pain | No                        |
| P16            | F   | 50-59        | Rural Village                | "Migrant" Rural Dweller        | 4                                                                        | Unemployed          | Diarrhoea, Stomach Pain                                | No                        |
| P17            | F   | 50-59        | Rural Village                | "Native" Rural Dweller         | 4                                                                        | Employed: Part Time | Constipation, Rectal Bleeding, Stomach Pain            | No                        |
| P18            | F   | 60-69        | Rural Town and Fringe        | "Native" Rural Dweller         | 5                                                                        | Self-Employed       | Constipation, Rectal Bleeding, Stomach Pain            | Yes                       |
| P19            | F   | 70-79        | Rural Village                | "Native" Rural Dweller         | 4                                                                        | Retired             | Stomach Pain                                           | Yes                       |
| P20            | F   | 80-89        | Rural Town and Fringe        | "Native" Rural Dweller         | 5                                                                        | Retired             | Constipation, Stomach Pain                             | Yes                       |
| P21            | F   | 60-69        | Rural Village                | "Migrant" Rural Dweller        | 4                                                                        | Employed: Part Time | Constipation                                           | No                        |
| P22            | F   | 50-59        | Rural Village                | "Native" Rural Dweller         | 4                                                                        | Retired             | Constipation                                           | No                        |
| P23            | M   | 60-69        | Rural Town and Fringe        | "Native" Rural Dweller         | 5                                                                        | Retired             | Constipation                                           | Yes                       |
| P24            | M   | 60-69        | Rural Town and Fringe        | "Migrant" Rural Dweller        | 2                                                                        | Retired             | Diarrhoea                                              | No                        |
| P25            | M   | 60-69        | Rural Town and Fringe        | "Native" Rural Dweller         | 2                                                                        | Retired             | Diarrhoea                                              | No                        |
| P26            | F   | 50-59        | Rural Village                | "Native" Rural Dweller         | 3                                                                        | Employed: Part Time | Constipation, Stomach Pain                             | No                        |
| P27            | F   | 70-79        | Rural Village                | "Migrant" Rural Dweller        | 3                                                                        | Retired             | Diarrhoea                                              | No                        |
| P28            | F   | 90-99        | Rural Village                | "Migrant" Rural Dweller        | 3                                                                        | Retired             | Constipation, Stomach Pain                             | No                        |
| P29            | M   | 40-49        | Rural Village                | "Migrant" Rural Dweller        | 3                                                                        | Employed: Full Time | Diarrhoea, Stomach Pain                                | No                        |
| P30            | M   | 60-69        | Rural Town and Fringe        | "Native" Rural Dweller         | 5                                                                        | Employed: Full Time | Constipation, Stomach Pain                             | No                        |
| P31            | M   | 70-79        | Rural Town and Fringe        | "Native" Rural Dweller         | 5                                                                        | Retired             | Diarrhoea, Constipation, Rectal Bleeding, Stomach Pain | No                        |
| P32            | F   | 60-69        | Rural Village                | "Migrant" Rural Dweller        | 3                                                                        | Self-Employed       | Diarrhoea                                              | Yes                       |
| P33            | F   | 70-79        | Rural Village                | "Native" Rural Dweller         | 3                                                                        | Retired             | Diarrhoea, Rectal Bleeding, Stomach Pain               | No                        |
| P34            | M   | 80-89        | Rural Village                | "Migrant" Rural Dweller        | 3                                                                        | Retired             | Constipation, Stomach Pain                             | Yes                       |
| P35            | F   | 60-69        | Rural Village                | "Migrant" Rural Dweller        | 3                                                                        | Retired             | Constipation, Stomach Pain                             | Yes                       |
| P36            | F   | 60-69        | Rural Village                | "Migrant" Rural Dweller        | 3                                                                        | Self-Employed       | Constipation, Stomach Pain                             | Yes                       |
| P37            | M   | 70-79        | Rural Village                | "Migrant" Rural Dweller        | 3                                                                        | Retired             | Constipation, Rectal Bleeding                          | No                        |
| P38            | M   | 40-49        | Rural Village                | "Native" Rural Dweller         | 3                                                                        | Unemployed          | Stomach Pain                                           | Yes                       |
| P39            | M   | 60-69        | Rural Village                | "Migrant" Rural Dweller        | 3                                                                        | Self-Employed       | Stomach Pain                                           | No                        |
| P40            | F   | 60-69        | Rural Village                | "Native" Rural Dweller         | 3                                                                        | Self-Employed       | Diarrhoea, Constipation, Stomach Pain                  | No                        |

# RURALLY

Recognition, Understandings of, and Responses to bowel symptoms  
Among people living in rural Localities of Yorkshire

## Interview Topic Guide

*This is a topic guide, to inform the content of the interview and topics to be covered, however, there is flexibility in incorporating questions on novel topics, probing participants, and changing topic order, as best suits each individual interviewee.*

### **Symptom Topics**

In the survey you said you had experienced x symptom, could you tell me a bit more about it?

Points to cover:

- When it started
- When it ended (or still ongoing?)
- What they thought it was
- Had they experienced that symptom before
- How did they feel about the symptom (worried, not bothered etc)
- Did it impact their work activities and, if so, how?
- Did it impact their family responsibilities and activities and, if so, how?
- Did it impact other daily or leisure activities and, if so, how?
- Did they talk to anyone about it? GP, pharmacist, practice nurse, 111, A&E, family, friend etc
  - What was the other persons' thoughts about it?
- Did they go to GP or A&E about it?
  - If yes, date of consult

\*repeat for every symptom and ask if there were others they didn't mention in the survey\*

### **Accessing Primary Care Topics**

- How long does it take them to travel to the GP surgery
- How do they typically get there? Car, bus, cycle, walk, taxi, other
- Do they find it easy to get an appointment?
- How do they feel about their local GPs and other staff at the practice?
- Are there other local health care services that they use? (eg pharmacy)
- Is there anything that would make it easier to go to the GP?

### **Rural Location & Daily Life Topics**

- How long have they lived in this, and other, rural areas?
- What is their occupation?
  - If it's a rural occupation, how does that influence symptom appraisal and management. Seasonality?
- What are their living circumstances and caring responsibilities

- Do they have family living close by? Has the family lived in the area for generations?
- Do you think people who live in rural areas are healthier?
- What are some of the health benefits of living in a rural area?
- What are some of the drawbacks of living in a rural area?
- Would you say that there are different groups, or types of people who live in rural areas? How would you describe these different groups?
- Do you think these different groups think about health or illness differently?
- Do you think that rural people think about health and illness differently to how someone in a town or a city might?
- Do you think people in rural areas are better equipped to deal with illness than those living in a town or a city might be?
  - If so, how?
- Do you think that they use the GP services differently?
- Do you think that rural people have a different relationship with the GP, or GP surgery as a whole, than people in say, a city, might do?
- Do you think that there is anything that stops 'rural people' from going to the doctors at times?
- Can you think of anything that may make it easier for yourself, or other rural people, to go to the doctor's when they are unwell?

## Post Pandemic Questions

### *Primary Care Consultations*

Have you had any telephone/video/e-consult consultations with your GP, or a practice nurse, since the start of the pandemic, in relation to ANY symptoms?

YES OR NO

If so:

- Did you feel like you are able to adequately explain the problem?
- Did you find it easier, or more difficult, to discuss symptoms 'remotely', than you might have done in person?
  - Possible prompts – logistical ease of childcare, reducing exposure risk, being overheard by family/confidentiality, building rapport, distractions of home, script and performative nature of attending the doctor's
- Did you feel that you were able to talk about ALL of the symptoms that were concerning you, as well as you may have done at an in-person consultation?
- Do you feel that you are able to talk about symptoms that you see as possibly unrelated to your main symptom – does this differ from how comfortable you might feel to raise an additional problem during an in-person consultation?
- Do you think that these types of consultation work for all health conditions or are there certain types of symptoms that you feel like it would never be appropriate for?
  - Does this differ by different types of remote consultation?
- Do you feel like they (GP/practice nurse) are able to properly assess you over the phone/video?
  - Do you feel like the GP is able to do their job to the best of their abilities using remote consultations?
- Do you think that video/telephone consults could be used more in the future for people who live in rural areas?
- In terms of accessing GP services during the pandemic, what systems or new ways of accessing services, do you think worked well? What didn't work well?

### *Accessing Health Care Post-COVID*

- Has Covid19 changed how you feel about going to the GP?
  - If so, how?
- Do you feel concerned about potentially exposing yourself (or your household) to COVID-19 by attending your GP surgery?
- Are there things that you would now no longer go to the doctor's about?
  - If so, do you think this is how you feel at the moment and it is likely to change in the future?
- Are there certain things you would always go to the doctor's about?
- Are there other places/people you would now consider going to for advice when you are unwell, before going to the doctor's?
- Has Covid19 changed how you would feel about potentially having to go to hospital?
  - If so, how?
- Have your thoughts and feelings about the NHS more broadly changed since the start of the pandemic, both in terms of NHS staff and the NHS as an organisation?
- Has the pandemic impacted your feelings about the trust you have for the NHS?
  - Does this trust differ between GPs and hospitals?

#### *Post Pandemic Rural Life*

- Do you think that COVID-19 has impacted rural communities in ways different to people living in say a city?
  - Impact on accessing services with public transport and remoteness
  - Impact on shopping with local shops closing
- Has it impacted the way the community interact?
  - Did you do any community activities before and how have these changed?
    - What does this mean to you?
- Do you think the pandemic will have a long term impact on rural communities?
  - In what ways?

Thank the participant and ask if there is anything else they would like to add about their thoughts on being a rural patient, and what that means when they are ill and for accessing health care?

# RURALLY CODING FRAMEWORK

## SYMPTOMATIC EXPERIENCE / THE PATIENT INTERVAL

### Symptoms & Help-Seeking

- Nature of symptoms
- Impact of symptoms
- Feelings towards symptoms
- Managing symptoms (diet etc)
- Length of symptoms
- Considering a cause
- Considering cancer
- Discussing symptoms
- Family history of symptoms
- Help-Seeking Decision Making
  - Sx's don't require a consultation
  - Sx's remain 'too long'
  - Initial explanations no longer hold

### Consulting

- Making an appointment
- Consultation encounter
- Secondary care investigations for symptoms
- Barriers to consulting for sx's
  - Distance
  - Transport
  - Time
  - GP/Px relationship
  - Finances
  - Opening times

## RURAL HEALTH CARE SERVICES

### Primary Care

- Mode of travel to GP
- Distance from GP
- Relationship with GP
- Relationship with practice staff
- Appointment triage
- Appointment availability
- Barriers to consulting for sx's
- Distance
- Transport
- Time
- GP/Px relationship
- Finances
- Opening times
- Making consultation easier
- 'Wasting the Dr's time'

### Specialist & Allied Health Svcs

- Out of hours services
- Pharmacies
- A&E
- Secondary care
- Patient transport

### INDEXING CODES

- Resides in a village
- Resides remotely
- Always lived rurally
- Rural migrant
- Tendency towards infrequent consultation
- Tendency towards 'regular' consultation

## RURAL HEALTH & ILLNESS

### Benefits of rurality

- Clean air
- Outdoor Living
- Less stress
- Peace & quiet
- Community
- Good primary care services

### Disadvantages of rurality

- Distance to specialist services
- Public transport
- Withdrawal of services
- Isolation

### Attitudes towards health

- Stoicism
- Self-sufficiency
- Active lifestyle
- 'getting on with it'

### Managing illness in rural areas

- Rural people as healthier
- Rural people as less health
- Health & rurality not related
- Ageing in rural areas
- Planning forwards to deal with future illness
- Applying knowledge of illness & bodies learned from animal husbandry to own symptom & illness experiences
